# Supplementary material for: Effects of DPP4 Inhibitors as Neuroprotective Drug on Cognitive Impairment in Patients with Type 2 Diabetes Mellitus: A Meta-Analysis and Systematic Review
Source: Int J Endocrinol. 2024 Feb 13;2024:9294113. doi: 10.1155/2024/9294113 (PMC10878760; doi:10.1155/2024/9294113)
Supplement: Supplementary Materials — (1) PRISMA Checklist: reporting standards for this systematic review and meta-analysis. (2) Table 1: characteristics of the ten prospective studies. (3) Figure S1: subgroup analysis of the effect of different treatment courses on cognitive impairment. (4) Figure S2: subgroup analysis of the effects of different age groups on cognitive impairment was analyzed. (5) Figure S3: subgroup analysis of the effect of different treatment durations on fasting blood glucose was analyzed. (6) Figure S4: subgroup analysis of the effect of different age groups on fasting blood glucose was analyzed. (7) Figure S5: subgroup analysis of the effect of different treatment durations on glycosylated hemoglobin was analyzed. (8) Figure S6: subgroup analysis of the effect of different age groups on glycosylated hemoglobin was analyzed. (9) Figure S7: subgroup analysis of the effect of different treatment durations on blood glucose at 2 hours after meal was analyzed. [file 9294113.f1.zip]

Archive with 3 entries (3 files):
- PRISMA Checklist (1).doc
- Supplementary pictures (1).docx
- Table 1 Characteristics of the ten prospective studies.pdf
