# Supplementary material for: Effects of DPP4 Inhibitors as Neuroprotective Drug on Cognitive Impairment in Patients with Type 2 Diabetes Mellitus: A Meta-Analysis and Systematic Review
Source: Int J Endocrinol. 2024 Feb 13;2024:9294113. doi: 10.1155/2024/9294113 (PMC10878760; doi:10.1155/2024/9294113)
Supplement: Supplementary Materials — (1) PRISMA Checklist: reporting standards for this systematic review and meta-analysis. (2) Table 1: characteristics of the ten prospective studies. (3) Figure S1: subgroup analysis of the effect of different treatment courses on cognitive impairment. (4) Figure S2: subgroup analysis of the effects of different age groups on cognitive impairment was analyzed. (5) Figure S3: subgroup analysis of the effect of different treatment durations on fasting blood glucose was analyzed. (6) Figure S4: subgroup analysis of the effect of different age groups on fasting blood glucose was analyzed. (7) Figure S5: subgroup analysis of the effect of different treatment durations on glycosylated hemoglobin was analyzed. (8) Figure S6: subgroup analysis of the effect of different age groups on glycosylated hemoglobin was analyzed. (9) Figure S7: subgroup analysis of the effect of different treatment durations on blood glucose at 2 hours after meal was analyzed. [file 9294113.f1.zip › Table 1 Characteristics of the ten prospective studies.pdf]

Table 1 Characteristics of the ten prospective studies

| Author                                      | Year | Research design | Treatment duration | Sample number | Sex ratio (female) | Age        | Control                      | Adjustment variable                     |
|---------------------------------------------|------|-----------------|--------------------|---------------|--------------------|------------|------------------------------|-----------------------------------------|
| Geert Jan Biessels et al., <sup>[16]</sup>  | 2021 | RCT             | 160Weeks           | 3163          | 1203 (3163)        | 64.4±9.1   | sulfonylureas                | BMI、Course of disease、HbA1c、FBG、LDL     |
| Esra ATES BULUT et al., <sup>[17]</sup>     | 2019 | RCT             | 180Days            | 95            | 47.5 (95)          | 74.4±7.9   | placebo                      | BMI、Course of disease、HbA1c、LDL         |
| JUJUN XUE et al., <sup>[18]</sup>           | 2019 | RCT             | 180Days            | 60            | 29 (60)            | 68.5±7.1   | sulfonylureas                | BMI、Course of disease、HbA1c、FBG、LDL、CRP |
| Geert Jan Biessels et al., <sup>[19]</sup>  | 2019 | RCT             | 2.5Years           | 1545          | 541 (1545)         | 67.8±8.3   | placebo                      | BMI、Course of disease、LDL               |
| JinLina et al., <sup>[20]</sup>             | 2017 | RCT             | 180Days            | 80            | 39 (80)            | 72.57±8.3  | sulfonylureas                | BMI、Course of disease、HbA1c、FBG         |
| Antonio Maria Borzi et al., <sup>[21]</sup> | 2019 | RCT             | 180Days            | 60            | 33 (60)            | 77.67±8.23 | metformin                    | BMI、Course of disease、HbA1c、FBG、LDL     |
| Maria Rosaria Rizzo et al., <sup>[22]</sup> | 2014 | RCT             | 2Years             | 240           | 146 (240)          | 73.1±4.2   | metformin                    | BMI、Course of disease、HbA1c、FBG         |
| WangJing et al., <sup>[23]</sup>            | 2019 | RCT             | 24Weeks            | 78            | 35 (78)            | 48.2±8.63  | Alpha-glycosidase inhibitors | BMI、Course of disease、HbA1c、FBG         |
| GuoWei et al., <sup>[24]</sup>              | 2021 | RCT             | 48Weeks            | 87            | 43 (44)            | 66.2±5.9   | sulfonylureas                | BMI、Course of disease、HbA1c、FBG         |
| HuZiyin et al., <sup>[25]</sup>             | 2018 | RCT             | 24Weeks            | 98            | 47 (98)            | 66.8±4.2   | metformin                    | BMI、Course of disease、HbA1c、FBG         |
